# Supplementary material for: Vaccine Hesitancy and Perceptions of the Community about Polio in High-Risk Areas of Karachi, Sindh, Pakistan
Source: MDPI journal article supplement (doi:10.3390/vaccines11010070), 2022-12-28
Supplement: s1 [file s1]

## Article

# Vaccine Hesitancy and Perceptions of the Community About Polio in High-Risk Areas of Karachi, Sindh, Pakistan

Fayaz Hussain Abbasi <sup>1</sup>, Ahmed Ali Shaikh <sup>1,2</sup>, Jaishri Mehraj <sup>1,3,\*</sup>, Syed Musa Raza <sup>1,4</sup>, Shumaila Rasool <sup>1,5</sup>, Umar Farooq Bullo <sup>1</sup>, Sandeep Mehraj <sup>1,5</sup>, Zamir Ali Phul <sup>1,5</sup>, Sundeep Sahitia <sup>1,6</sup>, Asif Ali Zardari<sup>1,6</sup> and Shoukat Ali Chandio <sup>1,4</sup>

<sup>1</sup> Emergency Operations Centre for Polio Eradication and Immunization, Government of Sindh, Karachi, 75510, Pakistan

<sup>2</sup> Bill and Melinda Gates Foundation, Islamabad 44000, Pakistan

<sup>3</sup> Integral Global Health Inc., Islamabad 44000, Pakistan

<sup>4</sup> The United Nations Children’s Fund (UNICEF), Islamabad 44050, Pakistan

<sup>5</sup> National Stop Transmission of Polio (N-STOP) Program, Karachi 75510, Pakistan

<sup>6</sup> World Health Organization (WHO), Islamabad 45500, Pakistan

\* Correspondence: jaishrimhraj@gmail.com; Tel.: +00 92-21-35213035 (JM)

**Table S1.** Union Council-wise distribution of study participants in 34 High-Risk Union Councils of Karachi division, Sindh, Pakistan.

| Union Councils       | Number | Percent |
|----------------------|--------|---------|
| BALOCH GOTH - 13     | 10     | 3.1     |
| BANARAS COLONY - 7   | 10     | 3.1     |
| BILAL COLONY - 1     | 10     | 3.1     |
| *CHISTI NAGAR - 7    | 10     | 3.1     |
| CIVIL LINES - 9      | 10     | 3.1     |
| FIRDOUS COLONY - 2   | 9      | 2.8     |
| FRONTIER COLONY - 6  | 10     | 3.1     |
| GARDEN EAST - 11     | 8      | 2.5     |
| *GUJRO A             | 10     | 3.1     |
| *GUJRO B             | 9      | 2.8     |
| *GUJRO C             | 10     | 3.1     |
| *GUJRO D             | 10     | 3.1     |
| *GUJRO E             | 10     | 3.1     |
| GULZAR-E-HIJRAI - 12 | 2      | 0.6     |
| ISLAM NAGAR - 3      | 10     | 3.1     |
| *ISLAMIA COLONY - 9  | 10     | 3.1     |
| *ITTEHAD TOWN - 2    | 10     | 3.1     |
| KHAMISO GOTH - 9     | 10     | 3.1     |
| MAMMARABAD – 6       | 10     | 3.1     |
| *MANGOPIR – 8        | 10     | 3.1     |
| MOMINABAD – 1        | 10     | 3.1     |
| *MUSLIMABAD – 2      | 10     | 3.1     |
| *MUZAFARABAD – 1     | 10     | 3.1     |

|                    |     |     |
|--------------------|-----|-----|
| NAZIMABAD -01 – 10 | 11  | 3.4 |
| PAHAR GANJ – 2     | 10  | 3.1 |
| PAPOSH NAGAR – 1   | 10  | 3.1 |
| PEHALWAN GOTH – 10 | 10  | 3.1 |
| QASBA COLONY – 8   | 10  | 3.1 |
| QUAIDABAD – 4      | 10  | 3.1 |
| REHRI – 2          | 10  | 3.1 |
| SAFORA – 13        | 6   | 1.8 |
| <b>*SONGAL – 5</b> | 10  | 3.1 |
| SULTANABAD – 2     | 10  | 3.1 |
| YOUSIF GOTH – 7    | 10  | 3.1 |
| Total              | 325 | 100 |

\* Super High-Risk Union Councils of Karachi.

**Table S2.** Switch pattern in reasons of missed children from one reason of refusal to another reason for the refusal or not available in different campaigns from Jan 2018 to March 2019 SIAs in 34 High-Risk Union Councils of Karachi division, Sindh, Pakistan.

[illegible]

[illegible]

[illegible]

|    |       |                |                  |                  |                |                  |                     |                |                     |                  |                  |                  |                |                |
|----|-------|----------------|------------------|------------------|----------------|------------------|---------------------|----------------|---------------------|------------------|------------------|------------------|----------------|----------------|
| 54 | G160  | Sickness       | Sickness         | Sickness         | Sickness       | Sickness         | Sickness            | Sickness       | Sickness            | Sickness         | Sickness         | Sickness         | Sickness       | Sickness       |
| 55 | SI15  | Sickness       | Sickness         | Sickness         | Sickness       | Sickness         | Sickness            | Sickness       |                     | Sickness         | Sickness         | Sickness         |                | Sickness       |
| 56 | K20   | Sickness       | Sickness         | Sickness         | Sickness       | Sickness         | Sickness            | Sickness       | Sickness            | Sickness         | Sickness         | Sickness         | Sickness       | Sickness       |
| 57 | G16   | Sickness       | Sickness         | Sickness         | Sickness       | Sickness         | Sickness            | Sickness       | Sickness            | Sickness         | Sickness         | Sickness         | Sickness       | Sickness       |
| 58 | G78   | Sickness       |                  | Sickness         | Sickness       | Sickness         | Sickness            | Sickness       | Sickness            | Sickness         | Sickness         | Sickness         | Sickness       | Sickness       |
| 59 | SD12  | Sickness       | Sickness         | Sickness         | Sickness       | Sickness         | Sickness            | Sickness       | Sickness            | Sickness         |                  | Sickness         | Sickness       | Sickness       |
| 60 | G84   | Outside UC     |                  |                  |                |                  |                     |                |                     | Outside UC       |                  | Outside UC       | Outside UC     | Outside UC     |
| 61 | NOR9  |                | Outside UC       | Outside UC       | Outside UC     | Outside UC       | Outside UC          | Outside UC     | Outside UC          | Outside UC       | Outside UC       | Outside UC       | Outside UC     | Outside UC     |
| 62 | G83   |                |                  |                  | Outside UC     |                  |                     | Outside UC     | Outside UC          | Outside UC       |                  |                  | Outside UC     | Outside UC     |
| 63 | BQ1   | Locked House   | Miscon-ception   | Miscon-ception   | Miscon-ception | Miscon-ception   | Miscon-ception      | Miscon-ception | Miscon-ception      | Miscon-ception   | Miscon-ception   | Miscon-ception   | Miscon-ception | Reason change  |
| 64 | OR11  | Miscon-ception |                  | Miscon-ception   | Miscon-ception | Miscon-ception   | Miscon-ception      |                | Miscon-ception      | Miscon-ception   | Miscon-ception   | Locked House     | Miscon-ception | Reason change  |
| 65 | G146  | Miscon-ception |                  |                  | Miscon-ception | Miscon-ception   | Miscon-ception      | Miscon-ception | Locked House        | Miscon-ception   | Miscon-ception   | Miscon-ception   | Miscon-ception | Miscon-ception |
| 66 | G3    | Outside UC     | Outside UC       | Outside UC       | Outside UC     |                  | Miscon-ception      | Outside UC     | Outside UC          | Outside UC       | Outside UC       | Outside UC       | Outside UC     | Reason change  |
| 67 | OR26  | Direct Refusal | Direct Refusal   | Direct Refusal   | Direct Refusal | Direct Refusal   | Miscon-ception      | Direct Refusal |                     | Locked House     | Locked House     | Locked House     |                | Reason change  |
| 68 | SI23  | Direct Refusal |                  | Locked House     | Sickness       | Locked House     | Direct Refusal      | Direct Refusal | Miscon-ception      | Direct Refusal   | Direct Refusal   | Direct Refusal   | Direct Refusal | Reason change  |
| 69 | LAN28 |                | Miscon-ception   | Miscon-ception   | Miscon-ception | Miscon-ception   | Repeated Cam-paigns |                | Repeated Cam-paigns | Outside UC       | Direct Refusal   | Miscon-ception   | Miscon-ception | Reason change  |
| 70 | KA19  | Miscon-ception | Outside UC       | Miscon-ception   | Miscon-ception | Miscon-ception   | Sickness            | Miscon-ception | Repeated Cam-paigns | Direct Refusal   | Direct Refusal   | Direct Refusal   | Miscon-ception | Reason change  |
| 71 | G134  | Outside UC     | Direct Refusal   | Outside UC       |                | Direct Refusal   |                     | Miscon-ception | Miscon-ception      | Miscon-ception   | Miscon-ception   | Miscon-ception   | Miscon-ception | Reason change  |
| 72 | OR28  | Miscon-ception | Inside UC        | Miscon-ception   | Miscon-ception | Miscon-ception   | Miscon-ception      | Miscon-ception | Repeated Cam-paigns | Direct Refusal   | Direct Refusal   | Direct Refusal   | Direct Refusal | Reason change  |
| 73 | LAN6  | Direct Refusal | Direct Refusal   | Direct Refusal   | Direct Refusal | Miscon-ception   | Direct Refusal      | Outside UC     | Miscon-ception      | Miscon-ception   | Miscon-ception   | Miscon-ception   | Outside UC     | Reason change  |
| 74 | OR48  | Direct Refusal | Direct Refusal   | Outside UC       | Direct Refusal | Miscon-ception   | Miscon-ception      | Miscon-ception | Miscon-ception      | Miscon-ception   | Miscon-ception   | Miscon-ception   | Miscon-ception | Reason change  |
| 75 | LAN3  | Miscon-ception | Religious Matter | Religious Matter | Direct Refusal | Religious Matter | Direct Refusal      | Direct Refusal | Religious Matter    | Religious Matter | Religious Matter | Religious Matter | Outside UC     | Reason change  |

|    |       |                    |                    |                            |                            |                            |                     |                    |                            |                     |                            |                     |                     |                  |
|----|-------|--------------------|--------------------|----------------------------|----------------------------|----------------------------|---------------------|--------------------|----------------------------|---------------------|----------------------------|---------------------|---------------------|------------------|
| 76 | OR12  | Miscon-<br>ception | Outside<br>UC      | Miscon-<br>ception         | Miscon-<br>ception         | Outside<br>UC              | Miscon-<br>ception  | Miscon-<br>ception | Miscon-<br>ception         | Miscon-<br>ception  | Miscon-<br>ception         | Miscon-<br>ception  | Outside<br>UC       | Reason<br>change |
| 77 | LQT3  | Miscon-<br>ception | Outside<br>UC      | Miscon-<br>ception         | Miscon-<br>ception         |                            | Religious<br>Matter | Miscon-<br>ception | Miscon-<br>ception         | Miscon-<br>ception  | Miscon-<br>ception         | Locked<br>House     | Miscon-<br>ception  | Reason<br>change |
| 78 | LAN11 | Direct<br>Refusal  | Direct<br>Refusal  | Direct<br>Refusal          | Direct<br>Refusal          | Direct<br>Refusal          | Direct<br>Refusal   |                    | Direct<br>Refusal          | Religious<br>Matter | Outside<br>UC              | Religious<br>Matter | Religious<br>Matter | Reason<br>change |
| 79 | G69   | Inside<br>UC       | Direct<br>Refusal  | Direct<br>Refusal          | Direct<br>Refusal          | Direct<br>Refusal          | Direct<br>Refusal   | Direct<br>Refusal  | Direct<br>Refusal          | Direct<br>Refusal   | Miscon-<br>ception         |                     | Miscon-<br>ception  | Reason<br>change |
| 80 | SD16  | Sickness           | Sickness           | Sickness                   | Sickness                   | Sickness                   | Sickness            | Sickness           |                            | Direct<br>Refusal   | Outside<br>UC              | Sickness            |                     | Reason<br>change |
| 81 | LQT23 |                    | Direct<br>Refusal  |                            | Outside<br>UC              | Miscon-<br>ception         | Direct<br>Refusal   | Miscon-<br>ception | Miscon-<br>ception         | Outside<br>UC       | Miscon-<br>ception         | Miscon-<br>ception  | Miscon-<br>ception  | Reason<br>change |
| 82 | G140  | Outside<br>UC      | Outside<br>UC      | Direct<br>Refusal          | Direct<br>Refusal          | Direct<br>Refusal          | Miscon-<br>ception  | Miscon-<br>ception | Direct<br>Refusal          | Miscon-<br>ception  | Miscon-<br>ception         | Miscon-<br>ception  | Miscon-<br>ception  | Reason<br>change |
| 83 | G103  | Outside<br>UC      | Direct<br>Refusal  |                            | Direct<br>Refusal          |                            | Outside<br>UC       | Direct<br>Refusal  | Direct<br>Refusal          | Outside<br>UC       | Repeated<br>Cam-<br>paigns | Miscon-<br>ception  | Miscon-<br>ception  | Reason<br>change |
| 84 | G111  | Direct<br>Refusal  | Direct<br>Refusal  |                            | Inside<br>UC               |                            | Outside<br>UC       | Outside<br>UC      | Outside<br>UC              | Outside<br>UC       | Direct<br>Refusal          | Inside<br>UC        | Outside<br>UC       | Reason<br>change |
| 85 | G135  |                    |                    | Direct<br>Refusal          | De-<br>mands               | De-<br>mands               | De-<br>mands        | De-<br>mands       | De-<br>mands               | Outside<br>UC       | Miscon-<br>ception         | Outside<br>UC       | Outside<br>UC       | Reason<br>change |
| 86 | LQT9  | De-<br>mands       | Inside<br>UC       | Direct<br>Refusal          | Sickness                   | Direct<br>Refusal          | Direct<br>Refusal   | Direct<br>Refusal  | Direct<br>Refusal          | Direct<br>Refusal   | Direct<br>Refusal          | Direct<br>Refusal   | Direct<br>Refusal   | Reason<br>change |
| 87 | KA3   | Outside<br>UC      | Direct<br>Refusal  | Direct<br>Refusal          | Direct<br>Refusal          | Miscon-<br>ception         | Miscon-<br>ception  | Miscon-<br>ception | Miscon-<br>ception         | Miscon-<br>ception  | Miscon-<br>ception         | Miscon-<br>ception  | Miscon-<br>ception  | Reason<br>change |
| 88 | LQT12 | Inside<br>UC       |                    | Miscon-<br>ception         | De-<br>mands               | In school                  | Miscon-<br>ception  | Miscon-<br>ception | Miscon-<br>ception         | Miscon-<br>ception  | Miscon-<br>ception         | Miscon-<br>ception  | Miscon-<br>ception  | Reason<br>change |
| 89 | G40   |                    | Inside<br>UC       | Repeated<br>Cam-<br>paigns | Repeated<br>Cam-<br>paigns | Repeated<br>Cam-<br>paigns | Direct<br>Refusal   | Direct<br>Refusal  | Repeated<br>Cam-<br>paigns | Locked<br>House     | Outside<br>UC              | Miscon-<br>ception  | Miscon-<br>ception  | Reason<br>change |
| 90 | G36   | Direct<br>Refusal  | Sickness           | Miscon-<br>ception         | Direct<br>Refusal          | Direct<br>Refusal          | Direct<br>Refusal   | Miscon-<br>ception | Sickness                   |                     | Direct<br>Refusal          | Outside<br>UC       | Outside<br>UC       | Reason<br>change |
| 91 | G153  | Outside<br>UC      | Miscon-<br>ception | Miscon-<br>ception         | Direct<br>Refusal          |                            | Direct<br>Refusal   | Miscon-<br>ception | Miscon-<br>ception         | Miscon-<br>ception  | Miscon-<br>ception         | Miscon-<br>ception  | Miscon-<br>ception  | Reason<br>change |
| 92 | G118  | Direct<br>Refusal  | Direct<br>Refusal  |                            | Inside<br>UC               |                            | Outside<br>UC       | Outside<br>UC      | Outside<br>UC              | Outside<br>UC       | Direct<br>Refusal          | Inside<br>UC        | Outside<br>UC       | Reason<br>change |
| 93 | LQT18 |                    |                    | Outside<br>UC              | Outside<br>UC              | Outside<br>UC              | Outside<br>UC       | Outside<br>UC      | Direct<br>Refusal          | Direct<br>Refusal   | Direct<br>Refusal          | Direct<br>Refusal   | Miscon-<br>ception  | Reason<br>change |
| 94 | LQT7  | Direct<br>Refusal  | Outside<br>UC      | Direct<br>Refusal          | Inside<br>UC               | Outside<br>UC              |                     |                    | Inside<br>UC               | Inside<br>UC        |                            | Inside<br>UC        | Outside<br>UC       | Reason<br>change |
| 95 | G127  |                    |                    | Outside<br>UC              | Outside<br>UC              | Religious<br>Matter        | Outside<br>UC       | Outside<br>UC      | Direct<br>Refusal          | Miscon-<br>ception  | Miscon-<br>ception         | Miscon-<br>ception  | Miscon-<br>ception  | Reason<br>change |

|     |       |                  |                     |                  |                     |                  |                  |                  |                |                |                |                |                  |               |
|-----|-------|------------------|---------------------|------------------|---------------------|------------------|------------------|------------------|----------------|----------------|----------------|----------------|------------------|---------------|
| 96  | SD1   | Direct Refusal   | Direct Refusal      | Direct Refusal   | Repeated Cam-paigns | Direct Refusal   | Direct Refusal   | Direct Refusal   | Direct Refusal | Direct Refusal | Direct Refusal | Direct Refusal | Outside UC       | Reason change |
| 97  | LAN9  | Direct Refusal   | Religious Matter    | Religious Matter | Religious Matter    | Religious Matter | Religious Matter | Religious Matter | Direct Refusal | Outside UC     | Miscon-ception | Sickness       | Religious Matter | Reason change |
| 98  | NA19  | Religious Matter | Religious Matter    | Religious Matter | Religious Matter    | Religious Matter |                  |                  | Outside UC     | Miscon-ception | Outside UC     | Miscon-ception | Miscon-ception   | Reason change |
| 99  | OR4   | Direct Refusal   |                     | Direct Refusal   | Direct Refusal      | Outside UC       | Outside UC       | Direct Refusal   | Miscon-ception | Miscon-ception |                | Miscon-ception | Miscon-ception   | Reason change |
| 100 | G117  | Direct Refusal   | Sickness            |                  | Inside UC           | Direct Refusal   | Direct Refusal   | Direct Refusal   | Direct Refusal | Direct Refusal | Direct Refusal | Direct Refusal | Direct Refusal   | Reason change |
| 101 | LAN29 | Religious Matter | Miscon-ception      | Miscon-ception   |                     | Miscon-ception   | Miscon-ception   |                  | Outside UC     | Locked House   | Direct Refusal | Miscon-ception | De-mands         | Reason change |
| 102 | OR22  | Locked House     | Locked House        |                  | Direct Refusal      | Miscon-ception   | Miscon-ception   | Miscon-ception   | Miscon-ception | Miscon-ception | Miscon-ception | Sickness       | Sickness         | Reason change |
| 103 | G150  |                  | Outside UC          | Miscon-ception   | Miscon-ception      | Miscon-ception   | Direct Refusal   | Miscon-ception   | Miscon-ception |                | Outside UC     |                | Miscon-ception   | Reason change |
| 104 | LAN30 | Religious Matter |                     | Miscon-ception   |                     | Miscon-ception   | Miscon-ception   |                  | Outside UC     | Locked House   | Direct Refusal | Miscon-ception | De-mands         | Reason change |
| 105 | G8    | Outside UC       |                     | Miscon-ception   | Direct Refusal      | Miscon-ception   |                  | Miscon-ception   | Miscon-ception |                |                |                | Outside UC       | Reason change |
| 106 | G176  |                  | Outside UC          |                  | Outside UC          |                  | Outside UC       | Outside UC       | Outside UC     | Miscon-ception | Inside UC      |                | Sickness         | Reason change |
| 107 | G87   |                  |                     |                  |                     |                  | Direct Refusal   | Direct Refusal   | Direct Refusal | Outside UC     | Miscon-ception | Miscon-ception | Miscon-ception   | Reason change |
| 108 | OR37  | Inside UC        | Repeated Cam-paigns | Inside UC        | Miscon-ception      | Miscon-ception   | Miscon-ception   | Direct Refusal   | Direct Refusal | Direct Refusal | Direct Refusal | Direct Refusal | Direct Refusal   | Reason change |
| 109 | OR36  | Inside UC        | Religious Matter    | Religious Matter | Locked House        | Miscon-ception   | Miscon-ception   | Direct Refusal   | Direct Refusal | Direct Refusal | Outside UC     | Direct Refusal | Direct Refusal   | Reason change |
| 110 | Nor12 |                  | Locked House        | Locked House     | Locked House        | Inside UC        | Inside UC        | Direct Refusal   | Sickness       | Direct Refusal | Direct Refusal | Direct Refusal | Direct Refusal   | Reason change |
| 111 | G79   | Miscon-ception   | Miscon-ception      | Miscon-ception   |                     |                  |                  |                  |                | Miscon-ception | Inside UC      | Miscon-ception | Miscon-ception   | Reason change |
| 112 | SI24  | Direct Refusal   |                     | Locked House     | Sickness            | Locked House     | Direct Refusal   | Direct Refusal   | Miscon-ception | Direct Refusal | Direct Refusal | Direct Refusal | Direct Refusal   | Reason change |
| 113 | SI25  |                  | Direct Refusal      | Direct Refusal   | Miscon-ception      | Miscon-ception   | Miscon-ception   | Miscon-ception   | Miscon-ception | Miscon-ception | Outside UC     | Miscon-ception | Miscon-ception   | Reason change |
| 114 | LQT1  |                  | Direct Refusal      |                  | Direct Refusal      | Direct Refusal   | Direct Refusal   | Direct Refusal   | Direct Refusal |                |                |                | Outside UC       | Reason change |
| 115 | G161  |                  |                     |                  | Direct Refusal      | Outside UC       | Direct Refusal   |                  | Miscon-ception |                |                | Sickness       | Outside UC       | Reason change |

|     |      |                     |                  |                     |                     |                  |                |                |                  |                |                     |                |                |               |
|-----|------|---------------------|------------------|---------------------|---------------------|------------------|----------------|----------------|------------------|----------------|---------------------|----------------|----------------|---------------|
| 116 | G49  |                     |                  |                     |                     |                  |                |                |                  | Direct Refusal | Outside UC          | Direct Refusal | Direct Refusal | Reason change |
| 117 | KA2  | Sickness            | Outside UC       | Sickness            | Sickness            | Sickness         | Sickness       | Sickness       | Sickness         | Sickness       | Sickness            | Sickness       | Sickness       | Reason change |
| 118 | G175 | Direct Refusal      |                  | Outside UC          | Direct Refusal      | Miscon-ception   | Miscon-ception | Direct Refusal | Direct Refusal   | Direct Refusal | Direct Refusal      | Miscon-ception | Direct Refusal | Reason change |
| 119 | G169 |                     | De-mands         | Miscon-ception      | Miscon-ception      |                  | Miscon-ception | Direct Refusal | Outside UC       | Miscon-ception | Miscon-ception      | Miscon-ception | Direct Refusal | Reason change |
| 120 | G159 |                     |                  | Direct Refusal      | Direct Refusal      | Direct Refusal   | Direct Refusal | Outside UC     | Locked House     | Outside UC     | Direct Refusal      | Miscon-ception | Miscon-ception | Reason change |
| 121 | G157 |                     |                  | Outside UC          | Locked House        | Inside UC        | Locked House   | Direct Refusal | Direct Refusal   | Direct Refusal | Direct Refusal      | Outside UC     | Inside UC      | Reason change |
| 122 | G62  |                     | Locked House     | Locked House        |                     |                  |                |                | Sickness         | Locked House   |                     | Locked House   | Locked House   | Reason change |
| 123 | SI30 | Miscon-ception      | Miscon-ception   |                     |                     | Miscon-ception   | Miscon-ception | Miscon-ception | Miscon-ception   | Outside UC     | Miscon-ception      | Miscon-ception | Miscon-ception | Reason change |
| 124 | OR45 | Direct Refusal      | Direct Refusal   | Outside UC          | Direct Refusal      | Locked House     | Locked House   | Locked House   |                  | Direct Refusal | De-mands            | Direct Refusal |                | Reason change |
| 125 | LAN7 | Miscon-ception      |                  | Miscon-ception      | Repeated Cam-paigns | Outside UC       | Outside UC     | Direct Refusal | Direct Refusal   | Miscon-ception | Miscon-ception      | Miscon-ception | Miscon-ception | Reason change |
| 126 | GI51 | Direct Refusal      | Outside UC       | Miscon-ception      | Direct Refusal      |                  | Direct Refusal | Direct Refusal | Direct Refusal   | Direct Refusal | Outside UC          |                | Outside UC     | Reason change |
| 127 | NA20 | Miscon-ception      | Miscon-ception   | Repeated Cam-paigns | Miscon-ception      | Miscon-ception   | Miscon-ception | Miscon-ception |                  | Miscon-ception | Miscon-ception      |                | Outside UC     | Reason change |
| 128 | NA26 | Outside UC          | Outside UC       | Direct Refusal      | Direct Refusal      | Direct Refusal   | Direct Refusal | Direct Refusal | Direct Refusal   | Direct Refusal | Miscon-ception      | Miscon-ception | Miscon-ception | Reason change |
| 129 | SI57 | Sickness            | Sickness         | Sickness            | Sickness            | Outside UC       | Miscon-ception | Sickness       | Direct Refusal   | Sickness       | Sickness            | Sickness       | Sickness       | Reason change |
| 130 | G131 | Outside UC          | Outside UC       | Direct Refusal      | Outside UC          | Outside UC       | Outside UC     | Direct Refusal | Miscon-ception   | Miscon-ception | Direct Refusal      | De-mands       | Sickness       | Reason change |
| 131 | G152 | Outside UC          | De-mands         | De-mands            | Miscon-ception      | Miscon-ception   | Miscon-ception | Miscon-ception | Miscon-ception   | Miscon-ception | Miscon-ception      | Miscon-ception | Miscon-ception | Reason change |
| 132 | NOR2 |                     | Sickness         | Outside UC          | Inside UC           | Direct Refusal   | Outside UC     | Direct Refusal | Miscon-ception   | Miscon-ception | Miscon-ception      | Miscon-ception | Inside UC      | Reason change |
| 133 | G5   | Miscon-ception      | Religious Matter | Religious Matter    | Religious Matter    | Religious Matter | Miscon-ception | Miscon-ception | Religious Matter |                |                     |                | Outside UC     | Reason change |
| 134 | G37  | Repeated Cam-paigns |                  |                     | Direct Refusal      | Outside UC       | Direct Refusal | Miscon-ception | Direct Refusal   | Inside UC      | Repeated Cam-paigns | Miscon-ception | Miscon-ception | Reason change |



|     |       |                     |                    |                    |                     |                            |                    |                    |                     |                    |                     |                            |                            |                  |
|-----|-------|---------------------|--------------------|--------------------|---------------------|----------------------------|--------------------|--------------------|---------------------|--------------------|---------------------|----------------------------|----------------------------|------------------|
| 135 | G13   | Sickness            |                    | Miscon-<br>ception | Miscon-<br>ception  | Miscon-<br>ception         | Outside<br>UC      |                    | Sickness            |                    |                     | Locked<br>House            | Sickness                   | Reason<br>change |
| 136 | G59   | Inside<br>UC        | Outside<br>UC      |                    |                     |                            |                    |                    | Inside<br>UC        | Outside<br>UC      | Outside<br>UC       |                            | Direct<br>Refusal          | Reason<br>change |
| 137 | G58   | Inside<br>UC        | Outside<br>UC      |                    |                     |                            |                    |                    | Inside<br>UC        | Outside<br>UC      | Outside<br>UC       |                            | Direct<br>Refusal          | Reason<br>change |
| 138 | G52   |                     |                    |                    |                     |                            | Outside<br>UC      |                    | Outside<br>UC       | Outside<br>UC      |                     | Outside<br>UC              | Direct<br>Refusal          | Reason<br>change |
| 139 | SI58  | Locked<br>House     | Locked<br>House    | Locked<br>House    | Locked<br>House     | Direct<br>Refusal          | Direct<br>Refusal  | Direct<br>Refusal  | Locked<br>House     | Direct<br>Refusal  | Religious<br>Matter | Religious<br>Matter        | Religious<br>Matter        | Reason<br>change |
| 140 | SI52  | Religious<br>Matter | Inside<br>UC       | Direct<br>Refusal  | Religious<br>Matter | Direct<br>Refusal          | Miscon-<br>ception | Direct<br>Refusal  | Miscon-<br>ception  | Miscon-<br>ception | Miscon-<br>ception  | Miscon-<br>ception         | Miscon-<br>ception         | Reason<br>change |
| 141 | J9    | Direct<br>Refusal   | Direct<br>Refusal  | Miscon-<br>ception | Miscon-<br>ception  | Miscon-<br>ception         | Miscon-<br>ception | Miscon-<br>ception | Miscon-<br>ception  | Miscon-<br>ception | Miscon-<br>ception  | Outside<br>UC              | Miscon-<br>ception         | Reason<br>change |
| 142 | LQT35 | Direct<br>Refusal   | Miscon-<br>ception |                    | Miscon-<br>ception  | Miscon-<br>ception         | Miscon-<br>ception | Outside<br>UC      | Religious<br>Matter | Miscon-<br>ception | Sickness            | Repeated<br>Cam-<br>paigns | Repeated<br>Cam-<br>paigns | Reason<br>change |
| 143 | G33   | Miscon-<br>ception  | Miscon-<br>ception | Miscon-<br>ception | Religious<br>Matter | Miscon-<br>ception         | Outside<br>UC      | Miscon-<br>ception | Miscon-<br>ception  | Miscon-<br>ception | Miscon-<br>ception  | Miscon-<br>ception         | Miscon-<br>ception         | Reason<br>change |
| 144 | J11   | Outside<br>UC       |                    | Outside<br>UC      | Miscon-<br>ception  | Miscon-<br>ception         | Miscon-<br>ception | Miscon-<br>ception | Miscon-<br>ception  | Miscon-<br>ception | Miscon-<br>ception  | Miscon-<br>ception         | Miscon-<br>ception         | Reason<br>change |
| 145 | G130  |                     | Outside<br>UC      |                    | Outside<br>UC       | Outside<br>UC              | Inside<br>UC       | Outside<br>UC      | Outside<br>UC       | Inside<br>UC       | Direct<br>Refusal   | Sickness                   | Direct<br>Refusal          | Reason<br>change |
| 146 | LAN32 |                     |                    | Direct<br>Refusal  | Direct<br>Refusal   | Direct<br>Refusal          | Direct<br>Refusal  | Outside<br>UC      | Outside<br>UC       | Direct<br>Refusal  | Miscon-<br>ception  | Miscon-<br>ception         | Repeated<br>Cam-<br>paigns | Reason<br>change |
| 147 | G134  | Outside<br>UC       | Direct<br>Refusal  | Outside<br>UC      |                     | Direct<br>Refusal          |                    | Miscon-<br>ception | Miscon-<br>ception  | Miscon-<br>ception | Miscon-<br>ception  | Miscon-<br>ception         | Miscon-<br>ception         | Reason<br>change |
| 148 | G80   | Direct<br>Refusal   | Direct<br>Refusal  | Direct<br>Refusal  | Direct<br>Refusal   | Direct<br>Refusal          | Direct<br>Refusal  | Direct<br>Refusal  | Outside<br>UC       | Outside<br>UC      |                     |                            | Outside<br>UC              | Reason<br>change |
| 149 | Nor5  |                     |                    | Inside<br>UC       | Direct<br>Refusal   | Direct<br>Refusal          | Direct<br>Refusal  |                    | Miscon-<br>ception  | Miscon-<br>ception | Direct<br>Refusal   | Miscon-<br>ception         | Miscon-<br>ception         | Reason<br>change |
| 150 | G9    | Sickness            | Sickness           | Sickness           |                     | Miscon-<br>ception         |                    | Locked<br>House    | Outside<br>UC       |                    |                     |                            | Miscon-<br>ception         | Reason<br>change |
| 151 | LAN33 | Miscon-<br>ception  | Miscon-<br>ception | Outside<br>UC      | Miscon-<br>ception  | Outside<br>UC              | Miscon-<br>ception | Miscon-<br>ception | Direct<br>Refusal   | Direct<br>Refusal  | Direct<br>Refusal   | Miscon-<br>ception         | Miscon-<br>ception         | Reason<br>change |
| 152 | SI54  | Inside<br>UC        | Locked<br>House    | Locked<br>House    | Locked<br>House     | Repeated<br>Cam-<br>paigns | Locked<br>House    | Direct<br>Refusal  | Miscon-<br>ception  | Miscon-<br>ception | Miscon-<br>ception  | Miscon-<br>ception         | Miscon-<br>ception         | Reason<br>change |
| 153 | B46   | Miscon-<br>ception  | Miscon-<br>ception | Miscon-<br>ception | Miscon-<br>ception  | Miscon-<br>ception         | Miscon-<br>ception | Miscon-<br>ception | Outside<br>UC       | Direct<br>Refusal  | Direct<br>Refusal   | Miscon-<br>ception         | Miscon-<br>ception         | Reason<br>change |

|     |       |                |                |                     |                  |                     |                |                |                     |                  |                |                     |                  |               |
|-----|-------|----------------|----------------|---------------------|------------------|---------------------|----------------|----------------|---------------------|------------------|----------------|---------------------|------------------|---------------|
| 154 | G171  | Locked House   |                |                     | Religious Matter | Religious Matter    | Outside UC     | Miscon-ception | Religious Matter    | Religious Matter | Direct Refusal | Direct Refusal      | Direct Refusal   | Reason change |
| 155 | G104  | Direct Refusal |                |                     | Direct Refusal   | Direct Refusal      | Direct Refusal | Direct Refusal | Direct Refusal      | Miscon-ception   | De-mands       |                     | Outside UC       | Reason change |
| 156 | G156  |                |                | Direct Refusal      | Direct Refusal   | Direct Refusal      | Direct Refusal | Locked House   | Direct Refusal      | De-mands         | De-mands       | Direct Refusal      | De-mands         | Reason change |
| 157 | G162  | Outside UC     |                |                     |                  | Miscon-ception      | Miscon-ception | Miscon-ception | Miscon-ception      | Direct Refusal   | Direct Refusal | Direct Refusal      | Direct Refusal   | Reason change |
| 158 | G173  | Outside UC     |                | Miscon-ception      | Inside UC        | Miscon-ception      | Direct Refusal | Direct Refusal | Direct Refusal      | Sickness         |                | Sickness            | Sickness         | Reason change |
| 159 | KA13  | Sickness       | Locked House   |                     | Sickness         | Repeated Cam-paigns |                | Sickness       | Miscon-ception      | Miscon-ception   | Miscon-ception |                     | Miscon-ception   | Reason change |
| 160 | B33   | Sickness       | Inside UC      | Miscon-ception      | Miscon-ception   | Miscon-ception      | Sickness       | Miscon-ception | Direct Refusal      | Direct Refusal   | Direct Refusal | Direct Refusal      | Miscon-ception   | Reason change |
| 161 | G12   | Miscon-ception |                | Direct Refusal      | Direct Refusal   | Direct Refusal      | Locked House   | Miscon-ception | Repeated Cam-paigns | Direct Refusal   | Direct Refusal | Sickness            | Sickness         | Reason change |
| 162 | LAN42 | Miscon-ception | Miscon-ception | Miscon-ception      | Miscon-ception   | Miscon-ception      | Miscon-ception | Locked House   |                     | Direct Refusal   | Miscon-ception | Miscon-ception      | Sickness         | Reason change |
| 163 | G97   |                | Direct Refusal | Locked House        | Direct Refusal   | Direct Refusal      |                |                |                     | Miscon-ception   | Direct Refusal | Direct Refusal      | Miscon-ception   | Reason change |
| 164 | SI60  | Outside UC     |                | Sickness            | Religious Matter | Direct Refusal      | Direct Refusal | Direct Refusal | Miscon-ception      | Miscon-ception   | Miscon-ception | Miscon-ception      | Miscon-ception   | Reason change |
| 165 | SI66  | Direct Refusal | Direct Refusal | Direct Refusal      | Direct Refusal   | Direct Refusal      | Locked House   | Direct Refusal | Direct Refusal      | Miscon-ception   | Miscon-ception | Miscon-ception      | Miscon-ception   | Reason change |
| 166 | G10   | Direct Refusal | Direct Refusal | Direct Refusal      | Locked House     | Direct Refusal      | Direct Refusal | Direct Refusal | Direct Refusal      | Direct Refusal   | Direct Refusal | Direct Refusal      | Direct Refusal   | Reason change |
| 167 | GI28  | Miscon-ception | Direct Refusal | Miscon-ception      | Direct Refusal   | Direct Refusal      | Direct Refusal | Direct Refusal | Miscon-ception      | Miscon-ception   | Miscon-ception | Miscon-ception      | Locked House     | Reason change |
| 168 | GI7   | Miscon-ception | Miscon-ception | Repeated Cam-paigns | Miscon-ception   | Miscon-ception      |                | Miscon-ception | Miscon-ception      | Miscon-ception   | Miscon-ception | Miscon-ception      | Miscon-ception   | Reason change |
| 169 | LAN10 | Direct Refusal | Direct Refusal | Direct Refusal      | Direct Refusal   | Direct Refusal      | Direct Refusal | Direct Refusal | Direct Refusal      | Religious Matter | Miscon-ception | Miscon-ception      | Religious Matter | Reason change |
| 170 | SD7   | Direct Refusal | Direct Refusal | Direct Refusal      | Sickness         | Direct Refusal      | Direct Refusal | Direct Refusal | Direct Refusal      | Direct Refusal   | Direct Refusal | Direct Refusal      | Religious Matter | Reason change |
| 171 | SI1   | Sickness       | Direct Refusal | Direct Refusal      | Miscon-ception   | Miscon-ception      | Miscon-ception | Miscon-ception | Miscon-ception      | Miscon-ception   | Direct Refusal | Miscon-ception      | Miscon-ception   | Reason change |
| 172 | BQ36  | Miscon-ception | Miscon-ception | Miscon-ception      | Miscon-ception   | Miscon-ception      | Miscon-ception | Miscon-ception | Miscon-ception      | Miscon-ception   | Miscon-ception | Repeated Cam-paigns | Miscon-ception   | Reason change |

|     |       |                            |                            |                            |                            |                            |                            |                            |                    |                            |                     |                     |                            |                  |
|-----|-------|----------------------------|----------------------------|----------------------------|----------------------------|----------------------------|----------------------------|----------------------------|--------------------|----------------------------|---------------------|---------------------|----------------------------|------------------|
| 173 | B42   | Direct<br>Refusal          | Direct<br>Refusal  | Direct<br>Refusal          | Direct<br>Refusal   | Miscon-<br>ception  | Miscon-<br>ception         | Reason<br>change |
| 174 | K3    | Direct<br>Refusal          | Direct<br>Refusal  | Direct<br>Refusal          | Direct<br>Refusal   | Direct<br>Refusal   | Miscon-<br>ception         | Reason<br>change |
| 175 | SI6   | Miscon-<br>ception         | Miscon-<br>ception         | Miscon-<br>ception         | Miscon-<br>ception         | Direct<br>Refusal          | Direct<br>Refusal          | Direct<br>Refusal          | Sickness           | Sickness                   | Direct<br>Refusal   | Direct<br>Refusal   | Direct<br>Refusal          | Reason<br>change |
| 176 | GI69  | Direct<br>Refusal          | Direct<br>Refusal          | Direct<br>Refusal          | Direct<br>Refusal          | Miscon-<br>ception         | Direct<br>Refusal          | Direct<br>Refusal          | Direct<br>Refusal  | Miscon-<br>ception         | Miscon-<br>ception  | Miscon-<br>ception  | Miscon-<br>ception         | Reason<br>change |
| 177 | B26   | Sickness                   | Sickness           | Sickness                   | Sickness            | Sickness            | Miscon-<br>ception         | Reason<br>change |
| 178 | B40   | Miscon-<br>ception         | Miscon-<br>ception         | Miscon-<br>ception         | Miscon-<br>ception         | Direct<br>Refusal          | Direct<br>Refusal          | Direct<br>Refusal          | Miscon-<br>ception | Miscon-<br>ception         | Miscon-<br>ception  | Religious<br>Matter | Miscon-<br>ception         | Reason<br>change |
| 179 | G115  | Direct<br>Refusal          | Direct<br>Refusal          | Direct<br>Refusal          | Direct<br>Refusal          | Direct<br>Refusal          | Direct<br>Refusal          | De-<br>mands               | Direct<br>Refusal  | Direct<br>Refusal          | Direct<br>Refusal   | Direct<br>Refusal   | Direct<br>Refusal          | Reason<br>change |
| 180 | KA15  | Direct<br>Refusal          | Direct<br>Refusal          | Direct<br>Refusal          | Sickness                   | Direct<br>Refusal          | De-<br>mands               | Direct<br>Refusal          | Direct<br>Refusal  | Direct<br>Refusal          | Direct<br>Refusal   | Direct<br>Refusal   | Direct<br>Refusal          | Reason<br>change |
| 181 | OR50  | Miscon-<br>ception         | Sickness                   | Miscon-<br>ception         | Miscon-<br>ception         | Sickness                   | Sickness                   | Sickness                   | Miscon-<br>ception | Miscon-<br>ception         | Miscon-<br>ception  | Miscon-<br>ception  | Miscon-<br>ception         | Reason<br>change |
| 182 | NOR7  | Miscon-<br>ception         | Sickness                   | Sickness                   | Sickness                   | Sickness                   | Sickness                   | Sickness                   | Sickness           | Sickness                   | Sickness            | Sickness            | Sickness                   | Reason<br>change |
| 183 | NA4   | Religious<br>Matter        | Religious<br>Matter        |                            | Direct<br>Refusal          | Direct<br>Refusal          | Direct<br>Refusal          | Direct<br>Refusal          | Direct<br>Refusal  | Direct<br>Refusal          | Direct<br>Refusal   | Direct<br>Refusal   | Direct<br>Refusal          | Reason<br>change |
| 184 | LQT27 | Direct<br>Refusal          | Repeated<br>Cam-<br>paigns |                            | Direct<br>Refusal          | Direct<br>Refusal          | Miscon-<br>ception         | Miscon-<br>ception         | Miscon-<br>ception | Miscon-<br>ception         | Miscon-<br>ception  | Miscon-<br>ception  | Repeated<br>Cam-<br>paigns | Reason<br>change |
| 185 | SI3   | Direct<br>Refusal          | Direct<br>Refusal  | Direct<br>Refusal          | Direct<br>Refusal   | Miscon-<br>ception  | Miscon-<br>ception         | Reason<br>change |
| 186 | OR44  | Repeated<br>Cam-<br>paigns |                    | Direct<br>Refusal          | Direct<br>Refusal   | Direct<br>Refusal   |                            | Reason<br>change |
| 187 | LAN12 | Direct<br>Refusal          | Direct<br>Refusal  | Religious<br>Matter        | Miscon-<br>ception  | Religious<br>Matter | Religious<br>Matter        | Reason<br>change |
| 188 | OR43  | Sickness                   |                    | Miscon-<br>ception         | Miscon-<br>ception  | Sickness            |                            | Reason<br>change |
| 189 | G138  | Direct<br>Refusal          |                            | Direct<br>Refusal          | Direct<br>Refusal          | Direct<br>Refusal          | Direct<br>Refusal          | Religious<br>Matter        | Miscon-<br>ception | Religious<br>Matter        | Religious<br>Matter | Religious<br>Matter | Religious<br>Matter        | Reason<br>change |
| 190 | K1    | De-<br>mands               | Miscon-<br>ception         | Miscon-<br>ception         | Miscon-<br>ception         | Miscon-<br>ception         | Miscon-<br>ception         | Miscon-<br>ception         | Miscon-<br>ception | Miscon-<br>ception         | Miscon-<br>ception  | Miscon-<br>ception  | Miscon-<br>ception         | Reason<br>change |
| 191 | GI30  | Miscon-<br>ception         | Miscon-<br>ception | Repeated<br>Cam-<br>paigns | Miscon-<br>ception  | Miscon-<br>ception  | Miscon-<br>ception         | Reason<br>change |

|     |       |                            |                    |                    |                            |                    |                    |                    |                    |                     |                     |                            |                    |                  |
|-----|-------|----------------------------|--------------------|--------------------|----------------------------|--------------------|--------------------|--------------------|--------------------|---------------------|---------------------|----------------------------|--------------------|------------------|
| 192 | GI12  | Miscon-<br>ception         | Miscon-<br>ception | Miscon-<br>ception | Miscon-<br>ception         | Miscon-<br>ception | Miscon-<br>ception | Miscon-<br>ception | Miscon-<br>ception | Direct<br>Refusal   | Miscon-<br>ception  | Miscon-<br>ception         | Miscon-<br>ception | Reason<br>change |
| 193 | OR7   | Direct<br>Refusal          | Direct<br>Refusal  | Direct<br>Refusal  | Direct<br>Refusal          | Direct<br>Refusal  | Direct<br>Refusal  | Direct<br>Refusal  | Miscon-<br>ception | Miscon-<br>ception  | Miscon-<br>ception  | Miscon-<br>ception         | Miscon-<br>ception | Reason<br>change |
| 194 | B19   | De-<br>mands               | De-<br>mands       | De-<br>mands       | Repeated<br>Cam-<br>paigns | De-<br>mands       | De-<br>mands       | De-<br>mands       | Direct<br>Refusal  | De-<br>mands        | De-<br>mands        | De-<br>mands               | Miscon-<br>ception | Reason<br>change |
| 195 | Nor13 | Sickness                   | Sickness           | Sickness           | Sickness                   | Miscon-<br>ception | Sickness           | Sickness           | Sickness           | Sickness            | Sickness            | Sickness                   | Sickness           | Reason<br>change |
| 196 | LQT33 | Repeated<br>Cam-<br>paigns | Miscon-<br>ception | Miscon-<br>ception | Repeated<br>Cam-<br>paigns |                    | Miscon-<br>ception | Miscon-<br>ception | Miscon-<br>ception | Miscon-<br>ception  | Miscon-<br>ception  | Miscon-<br>ception         | Miscon-<br>ception | Reason<br>change |
| 197 | OR29  | Miscon-<br>ception         | Miscon-<br>ception | Miscon-<br>ception | Miscon-<br>ception         | Miscon-<br>ception | Direct<br>Refusal  |                    | Direct<br>Refusal  | Miscon-<br>ception  | Miscon-<br>ception  | Miscon-<br>ception         | Miscon-<br>ception | Reason<br>change |
| 198 | OR49  | Miscon-<br>ception         | Miscon-<br>ception | Miscon-<br>ception | De-<br>mands               | Miscon-<br>ception | Miscon-<br>ception |                    | Miscon-<br>ception | Miscon-<br>ception  | Miscon-<br>ception  |                            | Miscon-<br>ception | Reason<br>change |
| 199 | B20   | Direct<br>Refusal          | Direct<br>Refusal  | Direct<br>Refusal  | Direct<br>Refusal          | Direct<br>Refusal  | Direct<br>Refusal  | Direct<br>Refusal  | Direct<br>Refusal  |                     | Direct<br>Refusal   |                            | Miscon-<br>ception | Reason<br>change |
| 200 | SI47  | Miscon-<br>ception         | Miscon-<br>ception | Miscon-<br>ception | Miscon-<br>ception         | Miscon-<br>ception | Miscon-<br>ception | Miscon-<br>ception |                    | Religious<br>Matter | Miscon-<br>ception  | Miscon-<br>ception         |                    | Reason<br>change |
| 201 | NA12  | Direct<br>Refusal          | Direct<br>Refusal  |                    | Direct<br>Refusal          | Direct<br>Refusal  | Direct<br>Refusal  | Direct<br>Refusal  | Direct<br>Refusal  | Miscon-<br>ception  | Miscon-<br>ception  | Miscon-<br>ception         | Miscon-<br>ception | Reason<br>change |
| 202 | Nor15 | Sickness                   | Direct<br>Refusal  | Direct<br>Refusal  | Direct<br>Refusal          | Direct<br>Refusal  | Direct<br>Refusal  | Direct<br>Refusal  |                    | Direct<br>Refusal   | Direct<br>Refusal   | Miscon-<br>ception         |                    | Reason<br>change |
| 203 | SI8   | Direct<br>Refusal          | Direct<br>Refusal  | Direct<br>Refusal  | Direct<br>Refusal          | Direct<br>Refusal  | Direct<br>Refusal  | Direct<br>Refusal  | Direct<br>Refusal  | De-<br>mands        |                     |                            | Miscon-<br>ception | Reason<br>change |
| 204 | SI45  | Direct<br>Refusal          | Direct<br>Refusal  | Direct<br>Refusal  | Direct<br>Refusal          | Direct<br>Refusal  | Direct<br>Refusal  | Direct<br>Refusal  | Direct<br>Refusal  | Religious<br>Matter | Direct<br>Refusal   |                            | Direct<br>Refusal  | Reason<br>change |
| 205 | NA13  | Direct<br>Refusal          | Direct<br>Refusal  |                    | Miscon-<br>ception         | Miscon-<br>ception | Miscon-<br>ception | Miscon-<br>ception | Miscon-<br>ception | Miscon-<br>ception  | Miscon-<br>ception  | Miscon-<br>ception         | Miscon-<br>ception | Reason<br>change |
| 206 | OR41  | Miscon-<br>ception         | Direct<br>Refusal  | Direct<br>Refusal  | Direct<br>Refusal          | Direct<br>Refusal  | Direct<br>Refusal  | Direct<br>Refusal  | Direct<br>Refusal  | Direct<br>Refusal   | Direct<br>Refusal   | Direct<br>Refusal          | Direct<br>Refusal  | Reason<br>change |
| 207 | LAN31 | Miscon-<br>ception         | Miscon-<br>ception | Miscon-<br>ception |                            | Miscon-<br>ception |                    | Sickness           | Miscon-<br>ception | Direct<br>Refusal   | Religious<br>Matter | Repeated<br>Cam-<br>paigns | Miscon-<br>ception | Reason<br>change |
| 208 | OR6   |                            |                    | Direct<br>Refusal  | Miscon-<br>ception         | Direct<br>Refusal  | Direct<br>Refusal  | Direct<br>Refusal  | Miscon-<br>ception | Miscon-<br>ception  | Miscon-<br>ception  |                            | Miscon-<br>ception | Reason<br>change |
| 209 | G143  | De-<br>mands               | Direct<br>Refusal  | Direct<br>Refusal  | Direct<br>Refusal          | Direct<br>Refusal  | Direct<br>Refusal  | Direct<br>Refusal  | Direct<br>Refusal  | Direct<br>Refusal   | Direct<br>Refusal   | Direct<br>Refusal          | Direct<br>Refusal  | Reason<br>change |
| 210 | LQT5  | Sickness                   |                    |                    |                            | Sickness           | Sickness           | Direct<br>Refusal  |                    |                     | Direct<br>Refusal   | Direct<br>Refusal          | Locked<br>House    | Reason<br>change |

|     |       |                            |                    |                            |                    |                            |                    |                    |                    |                     |                            |                            |                     |                  |
|-----|-------|----------------------------|--------------------|----------------------------|--------------------|----------------------------|--------------------|--------------------|--------------------|---------------------|----------------------------|----------------------------|---------------------|------------------|
| 211 | G88   |                            |                    |                            |                    |                            | Direct<br>Refusal  | Direct<br>Refusal  | Miscon-<br>ception | Direct<br>Refusal   | Direct<br>Refusal          | Direct<br>Refusal          | Miscon-<br>ception  | Reason<br>change |
| 212 | G100  |                            |                    |                            |                    |                            | Miscon-<br>ception | Direct<br>Refusal  | Direct<br>Refusal  | Direct<br>Refusal   | Miscon-<br>ception         |                            | Religious<br>Matter | Reason<br>change |
| 213 | G90   |                            |                    |                            |                    |                            |                    | Direct<br>Refusal  | Miscon-<br>ception | Direct<br>Refusal   | Direct<br>Refusal          |                            | Direct<br>Refusal   | Reason<br>change |
| 214 | G46   |                            |                    |                            |                    |                            |                    |                    | Direct<br>Refusal  | Direct<br>Refusal   |                            | De-<br>mands               | Sickness            | Reason<br>change |
| 215 | BQ31  | Sickness                   | Sickness           | Miscon-<br>ception         | Miscon-<br>ception | Miscon-<br>ception         | Miscon-<br>ception | Miscon-<br>ception | Miscon-<br>ception | Miscon-<br>ception  | Miscon-<br>ception         | Miscon-<br>ception         | Miscon-<br>ception  | Reason<br>change |
| 216 | GI1   | Direct<br>Refusal          | Miscon-<br>ception | Miscon-<br>ception         | Miscon-<br>ception | Miscon-<br>ception         | Miscon-<br>ception | Miscon-<br>ception | Miscon-<br>ception | Miscon-<br>ception  | Miscon-<br>ception         | Miscon-<br>ception         | Miscon-<br>ception  | Reason<br>change |
| 217 | GI27  | Direct<br>Refusal          | Miscon-<br>ception | Miscon-<br>ception         | Miscon-<br>ception | Miscon-<br>ception         | Miscon-<br>ception | Miscon-<br>ception | Miscon-<br>ception | Miscon-<br>ception  | Miscon-<br>ception         | Miscon-<br>ception         | Miscon-<br>ception  | Reason<br>change |
| 218 | B6    | Direct<br>Refusal          | Direct<br>Refusal  | Direct<br>Refusal          | Direct<br>Refusal  | Direct<br>Refusal          | Direct<br>Refusal  | Direct<br>Refusal  | Direct<br>Refusal  | Direct<br>Refusal   | Direct<br>Refusal          | Repeated<br>Cam-<br>paigns | Miscon-<br>ception  | Reason<br>change |
| 219 | SI69  | Miscon-<br>ception         | Miscon-<br>ception | Direct<br>Refusal          | Miscon-<br>ception | Miscon-<br>ception         | Miscon-<br>ception | Miscon-<br>ception |                    | Religious<br>Matter | Direct<br>Refusal          | Direct<br>Refusal          |                     | Reason<br>change |
| 220 | KA9   | Miscon-<br>ception         | Direct<br>Refusal  | Direct<br>Refusal          | Direct<br>Refusal  | Repeated<br>Cam-<br>paigns | Direct<br>Refusal  | De-<br>mands       | Sickness           | Direct<br>Refusal   |                            |                            | Direct<br>Refusal   | Reason<br>change |
| 221 | G77   | Repeated<br>Cam-<br>paigns | Direct<br>Refusal  | Direct<br>Refusal          | Direct<br>Refusal  |                            | Direct<br>Refusal  | Direct<br>Refusal  | Miscon-<br>ception | Miscon-<br>ception  | Miscon-<br>ception         | Miscon-<br>ception         | Direct<br>Refusal   | Reason<br>change |
| 222 | KA14  |                            | Miscon-<br>ception | Miscon-<br>ception         | Miscon-<br>ception | Miscon-<br>ception         | Miscon-<br>ception | Miscon-<br>ception | Miscon-<br>ception | Miscon-<br>ception  | Repeated<br>Cam-<br>paigns | Miscon-<br>ception         | Miscon-<br>ception  | Reason<br>change |
| 223 | G163  |                            |                    | Miscon-<br>ception         | Direct<br>Refusal  |                            | Direct<br>Refusal  | Sickness           | Direct<br>Refusal  | Sickness            | Sickness                   | Sickness                   | Sickness            | Reason<br>change |
| 224 | G56   |                            |                    |                            | Miscon-<br>ception | Miscon-<br>ception         | Miscon-<br>ception |                    | Miscon-<br>ception | Miscon-<br>ception  | Miscon-<br>ception         | Direct<br>Refusal          | Direct<br>Refusal   | Reason<br>change |
| 225 | GI5   | Miscon-<br>ception         | Miscon-<br>ception | Miscon-<br>ception         | Miscon-<br>ception | Miscon-<br>ception         | Miscon-<br>ception | Direct<br>Refusal  | Miscon-<br>ception | Miscon-<br>ception  | Miscon-<br>ception         | Miscon-<br>ception         | Miscon-<br>ception  | Reason<br>change |
| 226 | NA22  | Miscon-<br>ception         | Miscon-<br>ception | Miscon-<br>ception         | Miscon-<br>ception | Miscon-<br>ception         | Direct<br>Refusal  | Direct<br>Refusal  | Miscon-<br>ception | Miscon-<br>ception  | Miscon-<br>ception         | Miscon-<br>ception         | Miscon-<br>ception  | Reason<br>change |
| 227 | G70   | Direct<br>Refusal          | Direct<br>Refusal  | Repeated<br>Cam-<br>paigns | Miscon-<br>ception | Direct<br>Refusal          | Direct<br>Refusal  | Direct<br>Refusal  | Direct<br>Refusal  | Direct<br>Refusal   | Direct<br>Refusal          |                            | Direct<br>Refusal   | Reason<br>change |
| 228 | LQT24 | Direct<br>Refusal          | Direct<br>Refusal  |                            | Miscon-<br>ception | Miscon-<br>ception         | Miscon-<br>ception | Miscon-<br>ception | Direct<br>Refusal  | Direct<br>Refusal   | Miscon-<br>ception         | Direct<br>Refusal          | Direct<br>Refusal   | Reason<br>change |

|     |       |                            |                            |                    |                            |                     |                            |                            |                            |                            |                            |                     |                            |                  |
|-----|-------|----------------------------|----------------------------|--------------------|----------------------------|---------------------|----------------------------|----------------------------|----------------------------|----------------------------|----------------------------|---------------------|----------------------------|------------------|
| 229 | K7    | Miscon-<br>ception         | Direct<br>Refusal          | Miscon-<br>ception | Miscon-<br>ception         | Miscon-<br>ception  | Miscon-<br>ception         | Miscon-<br>ception         | Miscon-<br>ception         |                            |                            | Sickness            | Miscon-<br>ception         | Reason<br>change |
| 230 | nor10 | Direct<br>Refusal          | Direct<br>Refusal          | Direct<br>Refusal  | Direct<br>Refusal          |                     | Direct<br>Refusal          | Direct<br>Refusal          | Direct<br>Refusal          |                            | Direct<br>Refusal          | Miscon-<br>ception  | Miscon-<br>ception         | Reason<br>change |
| 231 | G93   | Direct<br>Refusal          |                            | Miscon-<br>ception | Miscon-<br>ception         | Miscon-<br>ception  | Miscon-<br>ception         | Miscon-<br>ception         | Miscon-<br>ception         | Direct<br>Refusal          |                            |                     | Direct<br>Refusal          | Reason<br>change |
| 232 | J3    | Direct<br>Refusal          | Miscon-<br>ception         | Miscon-<br>ception | Miscon-<br>ception         | Miscon-<br>ception  | Miscon-<br>ception         | Miscon-<br>ception         | Religious<br>Matter        | Miscon-<br>ception         | Miscon-<br>ception         | Miscon-<br>ception  | Miscon-<br>ception         | Reason<br>change |
| 233 | LQT29 | Direct<br>Refusal          | Direct<br>Refusal          |                    | Direct<br>Refusal          | Direct<br>Refusal   | Direct<br>Refusal          | Direct<br>Refusal          | Miscon-<br>ception         | Miscon-<br>ception         | Miscon-<br>ception         | Religious<br>Matter | Religious<br>Matter        | Reason<br>change |
| 234 | LQT26 | Direct<br>Refusal          | Repeated<br>Cam-<br>paigns |                    | Direct<br>Refusal          | Direct<br>Refusal   | Miscon-<br>ception         | Miscon-<br>ception         | Miscon-<br>ception         | Miscon-<br>ception         | Miscon-<br>ception         | Miscon-<br>ception  | Repeated<br>Cam-<br>paigns | Reason<br>change |
| 235 | K13   | Miscon-<br>ception         | Miscon-<br>ception         | Miscon-<br>ception | Miscon-<br>ception         | Religious<br>Matter | Miscon-<br>ception         | Miscon-<br>ception         | Miscon-<br>ception         | Miscon-<br>ception         | Miscon-<br>ception         | Miscon-<br>ception  | Miscon-<br>ception         | Reason<br>change |
| 236 | G31   | Miscon-<br>ception         | Repeated<br>Cam-<br>paigns | Miscon-<br>ception | Repeated<br>Cam-<br>paigns | Direct<br>Refusal   | Repeated<br>Cam-<br>paigns | Repeated<br>Cam-<br>paigns | Repeated<br>Cam-<br>paigns | Direct<br>Refusal          | Repeated<br>Cam-<br>paigns | Direct<br>Refusal   | Direct<br>Refusal          | Reason<br>change |
| 237 | OR25  | Direct<br>Refusal          | Direct<br>Refusal          | Direct<br>Refusal  | Direct<br>Refusal          | Direct<br>Refusal   | Direct<br>Refusal          | Direct<br>Refusal          |                            | Miscon-<br>ception         | Miscon-<br>ception         | Miscon-<br>ception  |                            | Reason<br>change |
| 238 | SI2   |                            | Direct<br>Refusal          | Direct<br>Refusal  | Miscon-<br>ception         | Miscon-<br>ception  | Miscon-<br>ception         | Miscon-<br>ception         | Miscon-<br>ception         | Miscon-<br>ception         | Direct<br>Refusal          | Miscon-<br>ception  | Miscon-<br>ception         | Reason<br>change |
| 239 | G172  | Repeated<br>Cam-<br>paigns |                            |                    | Religious<br>Matter        | Religious<br>Matter | Religious<br>Matter        | Religious<br>Matter        | Religious<br>Matter        | Sickness                   | Religious<br>Matter        | Religious<br>Matter | Direct<br>Refusal          | Reason<br>change |
| 240 | G57   |                            |                            |                    | Miscon-<br>ception         | Miscon-<br>ception  | Miscon-<br>ception         | Miscon-<br>ception         | Miscon-<br>ception         | Miscon-<br>ception         | Miscon-<br>ception         | Direct<br>Refusal   | Direct<br>Refusal          | Reason<br>change |
| 241 | GI14  | Miscon-<br>ception         | Miscon-<br>ception         | Miscon-<br>ception | Miscon-<br>ception         | Miscon-<br>ception  | Repeated<br>Cam-<br>paigns | Miscon-<br>ception         | Miscon-<br>ception         | Repeated<br>Cam-<br>paigns | Miscon-<br>ception         | Miscon-<br>ception  | Miscon-<br>ception         | Reason<br>change |
| 242 | BQ32  | Miscon-<br>ception         | Miscon-<br>ception         | Miscon-<br>ception | Miscon-<br>ception         | Miscon-<br>ception  | Miscon-<br>ception         | Miscon-<br>ception         | Miscon-<br>ception         | Miscon-<br>ception         | Miscon-<br>ception         | Miscon-<br>ception  | Repeated<br>Cam-<br>paigns | Reason<br>change |
| 243 | SI26  | Miscon-<br>ception         | Direct<br>Refusal          | Miscon-<br>ception | Miscon-<br>ception         | Miscon-<br>ception  | Miscon-<br>ception         | Miscon-<br>ception         | Miscon-<br>ception         | Miscon-<br>ception         | Miscon-<br>ception         | Miscon-<br>ception  | Miscon-<br>ception         | Reason<br>change |
| 244 | J14   | Direct<br>Refusal          | Direct<br>Refusal          | Miscon-<br>ception | Miscon-<br>ception         | Miscon-<br>ception  | Miscon-<br>ception         | Miscon-<br>ception         | Miscon-<br>ception         | Miscon-<br>ception         | Miscon-<br>ception         | Miscon-<br>ception  | Miscon-<br>ception         | Reason<br>change |
| 245 | KA5   | Miscon-<br>ception         | Miscon-<br>ception         | Direct<br>Refusal  | Miscon-<br>ception         | Direct<br>Refusal   | Miscon-<br>ception         | Miscon-<br>ception         | Miscon-<br>ception         | Miscon-<br>ception         | Miscon-<br>ception         | Miscon-<br>ception  | Miscon-<br>ception         | Reason<br>change |
| 246 | G128  | Direct<br>Refusal          | Sickness                   | Direct<br>Refusal  | Direct<br>Refusal          | Direct<br>Refusal   | Sickness                   | Direct<br>Refusal          | Sickness                   | Direct<br>Refusal          | Direct<br>Refusal          | Direct<br>Refusal   | Direct<br>Refusal          | Reason<br>change |

|     |      |                     |                     |                    |                    |                    |                    |                    |                     |                     |                     |                     |                     |                  |
|-----|------|---------------------|---------------------|--------------------|--------------------|--------------------|--------------------|--------------------|---------------------|---------------------|---------------------|---------------------|---------------------|------------------|
| 247 | SI12 | Miscon-<br>ception  | Miscon-<br>ception  | Miscon-<br>ception | Miscon-<br>ception | Miscon-<br>ception | Miscon-<br>ception | De-<br>mands       | Direct<br>Refusal   | Direct<br>Refusal   | Direct<br>Refusal   | Miscon-<br>ception  | Miscon-<br>ception  | Reason<br>change |
| 248 | GI50 | Miscon-<br>ception  | Miscon-<br>ception  | Miscon-<br>ception | Miscon-<br>ception | Miscon-<br>ception | Miscon-<br>ception | Miscon-<br>ception | Miscon-<br>ception  | Miscon-<br>ception  | Direct<br>Refusal   | Direct<br>Refusal   | Miscon-<br>ception  | Reason<br>change |
| 249 | G147 | Miscon-<br>ception  | Miscon-<br>ception  | Miscon-<br>ception | Miscon-<br>ception | De-<br>mands       | Miscon-<br>ception | Miscon-<br>ception | Miscon-<br>ception  | Miscon-<br>ception  | Miscon-<br>ception  |                     | Miscon-<br>ception  | Reason<br>change |
| 250 | K5   | Miscon-<br>ception  | Miscon-<br>ception  | Miscon-<br>ception | Miscon-<br>ception |                    | Miscon-<br>ception | Miscon-<br>ception | Direct<br>Refusal   | Miscon-<br>ception  | Miscon-<br>ception  | Miscon-<br>ception  | Miscon-<br>ception  | Reason<br>change |
| 251 | NA28 | Miscon-<br>ception  | Miscon-<br>ception  | Miscon-<br>ception | Miscon-<br>ception | Miscon-<br>ception | Miscon-<br>ception | Miscon-<br>ception | Religious<br>Matter | Miscon-<br>ception  | Miscon-<br>ception  | Miscon-<br>ception  | Miscon-<br>ception  | Reason<br>change |
| 252 | NA14 | Direct<br>Refusal   | Direct<br>Refusal   |                    | Direct<br>Refusal  | Direct<br>Refusal  | Direct<br>Refusal  | Direct<br>Refusal  | De-<br>mands        | Direct<br>Refusal   | Direct<br>Refusal   | Direct<br>Refusal   | Direct<br>Refusal   | Reason<br>change |
| 253 | GI57 | Miscon-<br>ception  | Miscon-<br>ception  | Direct<br>Refusal  | Direct<br>Refusal  | Sickness           | Direct<br>Refusal  | Direct<br>Refusal  | Direct<br>Refusal   | Direct<br>Refusal   | Miscon-<br>ception  |                     | Miscon-<br>ception  | Reason<br>change |
| 254 | NA1  | Direct<br>Refusal   | Direct<br>Refusal   |                    | Direct<br>Refusal  | Direct<br>Refusal  | Direct<br>Refusal  | Direct<br>Refusal  | De-<br>mands        | Miscon-<br>ception  | Miscon-<br>ception  | Miscon-<br>ception  | Miscon-<br>ception  | Reason<br>change |
| 255 | BQ2  | Miscon-<br>ception  | Sickness            | Sickness           | Sickness           | Sickness           | Sickness           | Sickness           | Sickness            | Miscon-<br>ception  | Sickness            | Sickness            | Miscon-<br>ception  | Reason<br>change |
| 256 | NA5  | Miscon-<br>ception  | Miscon-<br>ception  | Miscon-<br>ception | Direct<br>Refusal  | Direct<br>Refusal  | Miscon-<br>ception |                    | Miscon-<br>ception  | Miscon-<br>ception  | Miscon-<br>ception  | Miscon-<br>ception  | Miscon-<br>ception  | Reason<br>change |
| 257 | J13  | Direct<br>Refusal   | Direct<br>Refusal   | Miscon-<br>ception | Miscon-<br>ception | Miscon-<br>ception | Miscon-<br>ception | Miscon-<br>ception | Miscon-<br>ception  | Miscon-<br>ception  | Miscon-<br>ception  |                     | Miscon-<br>ception  | Reason<br>change |
| 258 | G27  | Miscon-<br>ception  | Direct<br>Refusal   | Sickness           | Sickness           | Sickness           | Sickness           | Sickness           | Sickness            |                     | Direct<br>Refusal   | Sickness            | Sickness            | Reason<br>change |
| 259 | SI68 | Direct<br>Refusal   | Sickness            | Direct<br>Refusal  | Miscon-<br>ception | Miscon-<br>ception | Miscon-<br>ception | Miscon-<br>ception | Miscon-<br>ception  | Direct<br>Refusal   | Direct<br>Refusal   | Direct<br>Refusal   | Direct<br>Refusal   | Reason<br>change |
| 260 | NA31 | Direct<br>Refusal   | Direct<br>Refusal   | Direct<br>Refusal  | Direct<br>Refusal  | Direct<br>Refusal  | Direct<br>Refusal  | Direct<br>Refusal  |                     | Direct<br>Refusal   | Miscon-<br>ception  | Miscon-<br>ception  |                     | Reason<br>change |
| 261 | NA15 | De-<br>mands        | Direct<br>Refusal   | Direct<br>Refusal  | Direct<br>Refusal  | Direct<br>Refusal  | Direct<br>Refusal  | Direct<br>Refusal  |                     | Direct<br>Refusal   | De-<br>mands        | Direct<br>Refusal   |                     | Reason<br>change |
| 262 | SI9  | Religious<br>Matter | Religious<br>Matter |                    | Miscon-<br>ception | Miscon-<br>ception | Miscon-<br>ception | Miscon-<br>ception | Religious<br>Matter | Religious<br>Matter | Religious<br>Matter | Religious<br>Matter | Miscon-<br>ception  | Reason<br>change |
| 263 | NA11 | Direct<br>Refusal   | Direct<br>Refusal   |                    | Direct<br>Refusal  | Direct<br>Refusal  | Direct<br>Refusal  | Direct<br>Refusal  | Direct<br>Refusal   | Miscon-<br>ception  | Religious<br>Matter | Religious<br>Matter | Religious<br>Matter | Reason<br>change |
| 264 | OR24 | Direct<br>Refusal   | Direct<br>Refusal   | Direct<br>Refusal  | Direct<br>Refusal  | Direct<br>Refusal  | Direct<br>Refusal  | Direct<br>Refusal  |                     | Miscon-<br>ception  | Miscon-<br>ception  | Miscon-<br>ception  |                     | Reason<br>change |
| 265 | SI51 | Sickness            | Sickness            | Sickness           |                    | Sickness           | Direct<br>Refusal  | Sickness           | Sickness            | Miscon-<br>ception  |                     | Miscon-<br>ception  | Miscon-<br>ception  | Reason<br>change |
| 266 | B8   | Sickness            | Sickness            | Sickness           | Sickness           | Sickness           | Sickness           |                    | Direct<br>Refusal   | Direct<br>Refusal   | Direct<br>Refusal   | Miscon-<br>ception  | Miscon-<br>ception  | Reason<br>change |

|     |       |                     |                            |                     |                            |                     |                     |                     |                            |                     |                            |                     |                     |                  |
|-----|-------|---------------------|----------------------------|---------------------|----------------------------|---------------------|---------------------|---------------------|----------------------------|---------------------|----------------------------|---------------------|---------------------|------------------|
| 267 | NA29  | Miscon-<br>ception  | Repeated<br>Cam-<br>paigns | Miscon-<br>ception  | Miscon-<br>ception         | Miscon-<br>ception  | Miscon-<br>ception  | Miscon-<br>ception  | Miscon-<br>ception         | Miscon-<br>ception  | Miscon-<br>ception         | Miscon-<br>ception  | Miscon-<br>ception  | Reason<br>change |
| 268 | G138  | Direct<br>Refusal   |                            | Direct<br>Refusal   | Direct<br>Refusal          | Direct<br>Refusal   | Direct<br>Refusal   | Religious<br>Matter | Miscon-<br>ception         | Religious<br>Matter | Religious<br>Matter        | Religious<br>Matter | Religious<br>Matter | Reason<br>change |
| 269 | NOR8  |                     | Direct<br>Refusal          | Direct<br>Refusal   | De-<br>mands               | De-<br>mands        | Direct<br>Refusal   |                     | Repeated<br>Cam-<br>paigns | Miscon-<br>ception  | Repeated<br>Cam-<br>paigns | Miscon-<br>ception  | Miscon-<br>ception  | Reason<br>change |
| 270 | SD13  | Direct<br>Refusal   |                            | Direct<br>Refusal   | Repeated<br>Cam-<br>paigns |                     | Direct<br>Refusal   | Direct<br>Refusal   | Direct<br>Refusal          | Miscon-<br>ception  | Miscon-<br>ception         | Miscon-<br>ception  | Miscon-<br>ception  | Reason<br>change |
| 271 | G123  |                     | Direct<br>Refusal          | Direct<br>Refusal   | Direct<br>Refusal          | Direct<br>Refusal   | Direct<br>Refusal   | De-<br>mands        | Direct<br>Refusal          | Direct<br>Refusal   | Direct<br>Refusal          | Direct<br>Refusal   | Direct<br>Refusal   | Reason<br>change |
| 272 | G35   | Religious<br>Matter | Direct<br>Refusal          | Direct<br>Refusal   | Direct<br>Refusal          | Direct<br>Refusal   | Direct<br>Refusal   | Direct<br>Refusal   | Miscon-<br>ception         |                     | Miscon-<br>ception         | Miscon-<br>ception  | Miscon-<br>ception  | Reason<br>change |
| 273 | G144  |                     |                            | Direct<br>Refusal   | Direct<br>Refusal          | Locked<br>House     | Direct<br>Refusal   | Direct<br>Refusal   | De-<br>mands               | Miscon-<br>ception  | De-<br>mands               | Miscon-<br>ception  | Miscon-<br>ception  | Reason<br>change |
| 274 | G86   |                     |                            |                     |                            |                     | Direct<br>Refusal   |                     | Repeated<br>Cam-<br>paigns | Miscon-<br>ception  | Direct<br>Refusal          | Direct<br>Refusal   | Direct<br>Refusal   | Reason<br>change |
| 275 | NA2   | Religious<br>Matter | Religious<br>Matter        | Religious<br>Matter | Religious<br>Matter        | Religious<br>Matter | Religious<br>Matter | Religious<br>Matter | Miscon-<br>ception         | Religious<br>Matter | Religious<br>Matter        | Religious<br>Matter | Miscon-<br>ception  | Reason<br>change |
| 276 | KA8   | Sickness            | Sickness                   | Direct<br>Refusal   | Sickness                   | Direct<br>Refusal   | De-<br>mands        | Direct<br>Refusal   | Sickness                   | Sickness            | Sickness                   | Sickness            | Sickness            | Reason<br>change |
| 277 | B37   | De-<br>mands        | De-<br>mands               | De-<br>mands        | De-<br>mands               | De-<br>mands        | De-<br>mands        | De-<br>mands        | De-<br>mands               | Miscon-<br>ception  | Miscon-<br>ception         | Miscon-<br>ception  | Miscon-<br>ception  | Reason<br>change |
| 278 | BQ15  | Religious<br>Matter | Religious<br>Matter        | Religious<br>Matter | Religious<br>Matter        | Religious<br>Matter | Religious<br>Matter | Religious<br>Matter | Religious<br>Matter        | Religious<br>Matter | Miscon-<br>ception         | Religious<br>Matter | Miscon-<br>ception  | Reason<br>change |
| 279 | SD3   | Direct<br>Refusal   | Sickness                   | Sickness            | Sickness                   | Sickness            | Sickness            | Sickness            | Sickness                   | Sickness            | Sickness                   | Sickness            | Sickness            | Reason<br>change |
| 280 | SI5   | Sickness            | Sickness                   | Sickness            | Sickness                   | Sickness            | Sickness            | Direct<br>Refusal   | Direct<br>Refusal          | Sickness            | Sickness                   | Sickness            | Sickness            | Reason<br>change |
| 281 | GI36  | Miscon-<br>ception  | Miscon-<br>ception         | Miscon-<br>ception  | Miscon-<br>ception         | Miscon-<br>ception  | Miscon-<br>ception  | Miscon-<br>ception  | Miscon-<br>ception         | Miscon-<br>ception  | Miscon-<br>ception         | Direct<br>Refusal   | Religious<br>Matter | Reason<br>change |
| 282 | LAN21 | Miscon-<br>ception  | Direct<br>Refusal          | Miscon-<br>ception  | Miscon-<br>ception         | Miscon-<br>ception  | Miscon-<br>ception  | Miscon-<br>ception  |                            | Miscon-<br>ception  | Miscon-<br>ception         | Miscon-<br>ception  | Miscon-<br>ception  | Reason<br>change |
| 283 | LQT11 |                     | Miscon-<br>ception         | Miscon-<br>ception  | Miscon-<br>ception         | Miscon-<br>ception  | Religious<br>Matter | Miscon-<br>ception  | Miscon-<br>ception         | Miscon-<br>ception  | Miscon-<br>ception         | Miscon-<br>ception  | Religious<br>Matter | Reason<br>change |
| 284 | LQT29 | Direct<br>Refusal   | Direct<br>Refusal          |                     | Direct<br>Refusal          | Direct<br>Refusal   | Direct<br>Refusal   | Direct<br>Refusal   | Miscon-<br>ception         | Miscon-<br>ception  | Miscon-<br>ception         | Religious<br>Matter | Religious<br>Matter | Reason<br>change |



|     |       |                            |                            |                     |                            |                     |                     |                            |                            |                     |                            |                            |                     |                  |
|-----|-------|----------------------------|----------------------------|---------------------|----------------------------|---------------------|---------------------|----------------------------|----------------------------|---------------------|----------------------------|----------------------------|---------------------|------------------|
| 285 | LQT34 | Direct<br>Refusal          | Direct<br>Refusal          | Direct<br>Refusal   |                            | Direct<br>Refusal   | Direct<br>Refusal   | Repeated<br>Cam-<br>paigns | Miscon-<br>ception         | Miscon-<br>ception  | Miscon-<br>ception         | Miscon-<br>ception         | Miscon-<br>ception  | Reason<br>change |
| 286 | BQ27  | Miscon-<br>ception         | Miscon-<br>ception         | Miscon-<br>ception  | Miscon-<br>ception         | Miscon-<br>ception  | Miscon-<br>ception  | Miscon-<br>ception         | Miscon-<br>ception         | Miscon-<br>ception  | Repeated<br>Cam-<br>paigns | Repeated<br>Cam-<br>paigns | Miscon-<br>ception  | Reason<br>change |
| 287 | SI43  | Miscon-<br>ception         |                            | Religious<br>Matter | Religious<br>Matter        | Religious<br>Matter | Miscon-<br>ception  | Religious<br>Matter        | Miscon-<br>ception         | Miscon-<br>ception  | Direct<br>Refusal          | Religious<br>Matter        | Miscon-<br>ception  | Reason<br>change |
| 288 | SI44  | Religious<br>Matter        | Religious<br>Matter        | Religious<br>Matter | Religious<br>Matter        |                     | Religious<br>Matter | Religious<br>Matter        | Religious<br>Matter        | Religious<br>Matter | Direct<br>Refusal          | Religious<br>Matter        | Religious<br>Matter | Reason<br>change |
| 289 | SI41  | Direct<br>Refusal          | Direct<br>Refusal          | Religious<br>Matter | Miscon-<br>ception         |                     | Religious<br>Matter | Miscon-<br>ception         | Religious<br>Matter        | Religious<br>Matter | Religious<br>Matter        | Miscon-<br>ception         | Miscon-<br>ception  | Reason<br>change |
| 290 | GI58  | Direct<br>Refusal          | Direct<br>Refusal          | Direct<br>Refusal   | Direct<br>Refusal          |                     | De-<br>mands        | Direct<br>Refusal          | Direct<br>Refusal          | Direct<br>Refusal   | Direct<br>Refusal          | Miscon-<br>ception         | Miscon-<br>ception  | Reason<br>change |
| 291 | SI36  | Religious<br>Matter        | Religious<br>Matter        | Religious<br>Matter | Repeated<br>Cam-<br>paigns |                     | Miscon-<br>ception  | De-<br>mands               | Direct<br>Refusal          | Miscon-<br>ception  | Miscon-<br>ception         | Miscon-<br>ception         | Religious<br>Matter | Reason<br>change |
| 292 | B2    | Direct<br>Refusal          | Direct<br>Refusal          | Direct<br>Refusal   | Direct<br>Refusal          |                     | Direct<br>Refusal   | Miscon-<br>ception         | Miscon-<br>ception         | Direct<br>Refusal   | Direct<br>Refusal          | Miscon-<br>ception         | Miscon-<br>ception  | Reason<br>change |
| 293 | BQ30  | Miscon-<br>ception         | Miscon-<br>ception         |                     | Miscon-<br>ception         | Miscon-<br>ception  | Miscon-<br>ception  | Religious<br>Matter        | Repeated<br>Cam-<br>paigns | Miscon-<br>ception  | Miscon-<br>ception         | Miscon-<br>ception         | Miscon-<br>ception  | Reason<br>change |
| 294 | LAN24 | Direct<br>Refusal          | Repeated<br>Cam-<br>paigns | Miscon-<br>ception  | Miscon-<br>ception         | Miscon-<br>ception  |                     | Miscon-<br>ception         | Miscon-<br>ception         | Miscon-<br>ception  | Sickness                   | Repeated<br>Cam-<br>paigns | Miscon-<br>ception  | Reason<br>change |
| 295 | GI52  | Direct<br>Refusal          | Direct<br>Refusal          | Direct<br>Refusal   | Direct<br>Refusal          | Direct<br>Refusal   | Direct<br>Refusal   | Direct<br>Refusal          | Direct<br>Refusal          | Miscon-<br>ception  | Miscon-<br>ception         | Miscon-<br>ception         | Miscon-<br>ception  | Reason<br>change |
| 296 | BQ34  | Direct<br>Refusal          | Direct<br>Refusal          | Miscon-<br>ception  | Miscon-<br>ception         | Miscon-<br>ception  | Miscon-<br>ception  | Miscon-<br>ception         | Miscon-<br>ception         | Miscon-<br>ception  | Miscon-<br>ception         | Miscon-<br>ception         | Miscon-<br>ception  | Reason<br>change |
| 297 | NA23  | Miscon-<br>ception         |                            |                     | Miscon-<br>ception         | Miscon-<br>ception  | Miscon-<br>ception  | Miscon-<br>ception         | Religious<br>Matter        | Miscon-<br>ception  | Religious<br>Matter        | Miscon-<br>ception         | Miscon-<br>ception  | Reason<br>change |
| 298 | G120  | Miscon-<br>ception         | Miscon-<br>ception         | Miscon-<br>ception  | Miscon-<br>ception         | Miscon-<br>ception  | Miscon-<br>ception  | Miscon-<br>ception         | Miscon-<br>ception         | Miscon-<br>ception  | Repeated<br>Cam-<br>paigns | Miscon-<br>ception         | Sickness            | Reason<br>change |
| 299 | G34   | Repeated<br>Cam-<br>paigns | Repeated<br>Cam-<br>paigns | Miscon-<br>ception  | Repeated<br>Cam-<br>paigns | Miscon-<br>ception  |                     | Direct<br>Refusal          | Sickness                   | Direct<br>Refusal   | Direct<br>Refusal          | Direct<br>Refusal          | Direct<br>Refusal   | Reason<br>change |
| 300 | LAN36 | Miscon-<br>ception         | Miscon-<br>ception         |                     | Religious<br>Matter        | Miscon-<br>ception  | Miscon-<br>ception  | Miscon-<br>ception         | Religious<br>Matter        | Direct<br>Refusal   | Direct<br>Refusal          | Miscon-<br>ception         | Direct<br>Refusal   | Reason<br>change |
| 301 | B12   |                            |                            |                     |                            | Sickness            | Direct<br>Refusal   | Direct<br>Refusal          | Direct<br>Refusal          | Direct<br>Refusal   | Direct<br>Refusal          | Miscon-<br>ception         | Miscon-<br>ception  | Reason<br>change |

|     |       |                            |                            |                            |                    |                            |                            |                            |                            |                            |                     |                     |                     |                  |
|-----|-------|----------------------------|----------------------------|----------------------------|--------------------|----------------------------|----------------------------|----------------------------|----------------------------|----------------------------|---------------------|---------------------|---------------------|------------------|
| 302 | SD15  | Direct<br>Refusal          |                            | Direct<br>Refusal          | Direct<br>Refusal  | Direct<br>Refusal          | Direct<br>Refusal          | Direct<br>Refusal          | Direct<br>Refusal          | Direct<br>Refusal          | Miscon-<br>ception  | Miscon-<br>ception  | Miscon-<br>ception  | Reason<br>change |
| 303 | G155  |                            | Sickness                   |                            | Miscon-<br>ception | Miscon-<br>ception         | Miscon-<br>ception         | Miscon-<br>ception         | Miscon-<br>ception         | Miscon-<br>ception         | Miscon-<br>ception  | Miscon-<br>ception  | Miscon-<br>ception  | Reason<br>change |
| 304 | G92   | Sickness                   | Repeated<br>Cam-<br>paigns | Sickness                   | Sickness           |                            |                            |                            |                            | Direct<br>Refusal          | Direct<br>Refusal   | Direct<br>Refusal   | Direct<br>Refusal   | Reason<br>change |
| 305 | G81   |                            |                            | Repeated<br>Cam-<br>paigns | Direct<br>Refusal  | Direct<br>Refusal          | Miscon-<br>ception         | Direct<br>Refusal          | Direct<br>Refusal          | Direct<br>Refusal          | Miscon-<br>ception  | Direct<br>Refusal   | Miscon-<br>ception  | Reason<br>change |
| 306 | G4    | Direct<br>Refusal          | Direct<br>Refusal          | Miscon-<br>ception         | Miscon-<br>ception | Repeated<br>Cam-<br>paigns |                            |                            | Miscon-<br>ception         | Miscon-<br>ception         |                     | Miscon-<br>ception  | Miscon-<br>ception  | Reason<br>change |
| 307 | G39   | Repeated<br>Cam-<br>paigns |                            |                            |                    | Direct<br>Refusal          | Repeated<br>Cam-<br>paigns | Repeated<br>Cam-<br>paigns | Repeated<br>Cam-<br>paigns | Repeated<br>Cam-<br>paigns | Direct<br>Refusal   | Religious<br>Matter | Religious<br>Matter | Reason<br>change |
| 308 | G85   |                            |                            |                            |                    | Direct<br>Refusal          |                            |                            |                            | Direct<br>Refusal          | Direct<br>Refusal   | Miscon-<br>ception  | Miscon-<br>ception  | Reason<br>change |
| 309 | LAN44 | Direct<br>Refusal          | Direct<br>Refusal          | Direct<br>Refusal          | Direct<br>Refusal  | Sickness                   | Miscon-<br>ception         | Miscon-<br>ception         | Miscon-<br>ception         | Miscon-<br>ception         | Miscon-<br>ception  | Miscon-<br>ception  | Miscon-<br>ception  | Reason<br>change |
| 310 | LAN8  | Direct<br>Refusal          | Direct<br>Refusal          | Miscon-<br>ception         | Miscon-<br>ception | Direct<br>Refusal          | Direct<br>Refusal          | Direct<br>Refusal          | Direct<br>Refusal          | Miscon-<br>ception         | Miscon-<br>ception  | Religious<br>Matter | Miscon-<br>ception  | Reason<br>change |
| 311 | B41   | Direct<br>Refusal          | Direct<br>Refusal          | Direct<br>Refusal          | Direct<br>Refusal  | Direct<br>Refusal          | Direct<br>Refusal          | Miscon-<br>ception         | Direct<br>Refusal          | Direct<br>Refusal          | Direct<br>Refusal   | Direct<br>Refusal   | Direct<br>Refusal   | Reason<br>change |
| 312 | BQ25  | Sickness                   | Miscon-<br>ception         | Miscon-<br>ception         | Miscon-<br>ception | Miscon-<br>ception         | Miscon-<br>ception         | Miscon-<br>ception         | Miscon-<br>ception         | Miscon-<br>ception         | Miscon-<br>ception  | Miscon-<br>ception  | Miscon-<br>ception  | Reason<br>change |
| 313 | B10   | Direct<br>Refusal          | Direct<br>Refusal          | Miscon-<br>ception         | Miscon-<br>ception | Direct<br>Refusal          | Religious<br>Matter        | Miscon-<br>ception         | Miscon-<br>ception         | Miscon-<br>ception         | Miscon-<br>ception  | Miscon-<br>ception  | Miscon-<br>ception  | Reason<br>change |
| 314 | SI34  | Direct<br>Refusal          | Direct<br>Refusal          | Sickness                   | Direct<br>Refusal  | Direct<br>Refusal          | Direct<br>Refusal          | Direct<br>Refusal          | Direct<br>Refusal          | Direct<br>Refusal          | Direct<br>Refusal   | Direct<br>Refusal   | Direct<br>Refusal   | Reason<br>change |
| 315 | J12   | Religious<br>Matter        | Miscon-<br>ception         | Miscon-<br>ception         | Miscon-<br>ception | Miscon-<br>ception         | Miscon-<br>ception         | Miscon-<br>ception         | Miscon-<br>ception         | Miscon-<br>ception         | Miscon-<br>ception  | Miscon-<br>ception  | Miscon-<br>ception  | Reason<br>change |
| 316 | SI39  | Religious<br>Matter        | Religious<br>Matter        | Direct<br>Refusal          | Miscon-<br>ception | Miscon-<br>ception         | Religious<br>Matter        | Religious<br>Matter        | Religious<br>Matter        | Religious<br>Matter        | Religious<br>Matter | Religious<br>Matter | Religious<br>Matter | Reason<br>change |
| 317 | B13   | Sickness                   | Direct<br>Refusal          | Direct<br>Refusal          | Direct<br>Refusal  | Direct<br>Refusal          | Direct<br>Refusal          | Direct<br>Refusal          | Direct<br>Refusal          | Direct<br>Refusal          | Direct<br>Refusal   | Direct<br>Refusal   | Miscon-<br>ception  | Reason<br>change |
| 318 | GI43  | Miscon-<br>ception         | Miscon-<br>ception         | Miscon-<br>ception         | Miscon-<br>ception | Miscon-<br>ception         | Miscon-<br>ception         | Miscon-<br>ception         | Miscon-<br>ception         | Miscon-<br>ception         | Direct<br>Refusal   | Miscon-<br>ception  | Miscon-<br>ception  | Reason<br>change |
| 319 | SI32  | Direct<br>Refusal          | Direct<br>Refusal          | Direct<br>Refusal          | Direct<br>Refusal  | Direct<br>Refusal          | Direct<br>Refusal          | Direct<br>Refusal          | Direct<br>Refusal          | Direct<br>Refusal          | Direct<br>Refusal   | Direct<br>Refusal   | Miscon-<br>ception  | Reason<br>change |
| 320 | B30   | Direct<br>Refusal          | Miscon-<br>ception         | De-<br>mands               | Direct<br>Refusal  | Direct<br>Refusal          | Direct<br>Refusal          | Direct<br>Refusal          | De-<br>mands               | Direct<br>Refusal          | Direct<br>Refusal   | Miscon-<br>ception  | Miscon-<br>ception  | Reason<br>change |

|     |      |                   |                   |                     |                     |                     |                     |                     |                     |                     |                     |                     |                     |                  |
|-----|------|-------------------|-------------------|---------------------|---------------------|---------------------|---------------------|---------------------|---------------------|---------------------|---------------------|---------------------|---------------------|------------------|
| 321 | J19  | Direct<br>Refusal | Direct<br>Refusal | Religious<br>Matter | Reason<br>change |
| 322 | SD10 | Locked<br>House   | Locked<br>House   | Locked<br>House     | Locked<br>House     | Locked<br>House     | Locked<br>House     | Locked<br>House     | Locked<br>House     | Locked<br>House     |                     | Outside<br>UC       | Locked<br>House     | Reason<br>change |
| 323 | SD2  | Outside<br>UC     | Outside<br>UC     | Outside<br>UC       | Outside<br>UC       | Outside<br>UC       | Outside<br>UC       | Outside<br>UC       | Locked<br>House     | Inside<br>UC        | Outside<br>UC       | Locked<br>House     | Outside<br>UC       | Reason<br>change |
| 324 | G66  |                   |                   |                     |                     |                     | Locked<br>House     | Outside<br>UC       | Locked<br>House     | Outside<br>UC       |                     | Outside<br>UC       | Outside<br>UC       | Reason<br>change |
| 325 | G50  |                   |                   |                     |                     |                     |                     |                     |                     | Outside<br>UC       | Inside<br>UC        | Outside<br>UC       | Outside<br>UC       | Reason<br>change |

**Supplementary material:** Cronbach's Score for the reliability of the questions\_

### RELIABILITY OF QUESTIONNAIRE

**DATE OF TESTING:**

**PLACE OF TESTING:** RHC Kemari

**SAMPLE SIZE:** 10 Respondents were selected randomly from the Outpatient department of the Rural Health Center.

**DATA COLLECTOR:** Staff trained on the questionnaire and principal investigator

**DATA COLLECTION METHOD:** Face-to-face interview

**METHODS:**

A total of 10 interviews were conducted to calculate Cronbach's Score for the reliability of the questions. The data was cleaned and put in excel for analysis. Two variances were calculated each for the individual question and the total variance of the questionnaire. Of all 25 questions, only questions no 4 and 6 were needing more elaboration by the data collector as requested by the respondent. However, remaining all questions were answered in a single go. The total time to complete each questionnaire was 5 to 7 minutes. Cronbach's coefficient was used to test the reliability of the questionnaire. We got Cronbach's Coefficient of 0.70 which shows the content of the questionnaire was acceptable. All questions were culturally acceptable to the community.

**Formula:**

$$\alpha = \frac{n}{n-1} \left( 1 - \frac{\sum s^2(X_i)}{s^2(Y)} \right)$$

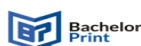

Taken from Website; <https://www.bachelorprint.com/statistics/cronbachs-alpha/>

| Test-Retest Validity of Questionnaire |       |
|---------------------------------------|-------|
| #items/questions                      | 25    |
| Sum of item variance                  | 4.19  |
| The variance of total score           | 15.43 |
| Cronbach's Alpha Coefficient          | 0.70  |

**Conclusion:**

The questionnaire assessed in this study proved to be a valid and reliable tool to measure the outcome of interest. Since it is easy to understand and can be completed by the participants in a short time.

**Financial support and sponsorship**

Nil

**Conflicts of interest**

There are no conflicts of interest

THANK YOU

## Supplementary material: Master trainer's performance indicators

## Performance Indicators – Lead Trainers

| S. No. | KPIs (60% weightage) | Definition                                                                                                                                                                                                                                           | S. No. | Attributes / Soft Skills (30% weightage) | Definition                                                                                                                                                                                                                                                                     |
|--------|----------------------|------------------------------------------------------------------------------------------------------------------------------------------------------------------------------------------------------------------------------------------------------|--------|------------------------------------------|--------------------------------------------------------------------------------------------------------------------------------------------------------------------------------------------------------------------------------------------------------------------------------|
| 1      | Coordination         | <ul style="list-style-type: none"> <li>▪ DPCR</li> <li>▪ EOC</li> </ul>                                                                                                                                                                              | 1      | Communication and Interpersonal Skills   | Effective communication with the district (DPCR and Provincial EOC)                                                                                                                                                                                                            |
| 2      | Training Planning    | <ul style="list-style-type: none"> <li>▪ Ensures the training is supported by TNA</li> <li>▪ Agenda development and necessary Modification</li> <li>▪ Review of training material/ methodologies</li> <li>▪ Logistic planning of sessions</li> </ul> | 2      | Leadership                               | <ul style="list-style-type: none"> <li>▪ Stakeholder management</li> <li>▪ Confidence</li> <li>▪ Motivates/assists his team</li> <li>▪ Mental Maturity – knows how to behave in different situations</li> <li>▪ Empowers the team</li> <li>▪ Mentoring and coaching</li> </ul> |
| 3      | Field Support        | <ul style="list-style-type: none"> <li>▪ Venue mapping and validation</li> <li>▪ Supportive supervision in the field</li> </ul>                                                                                                                      | 3      | Organized Approach                       | <ul style="list-style-type: none"> <li>▪ Is able to manage various tasks in an efficient and timely manner</li> <li>▪ Resource management</li> </ul>                                                                                                                           |
| 4      | Supervision          | <ul style="list-style-type: none"> <li>▪ Attendance</li> <li>▪ Field deployment planning</li> <li>▪ Ensuring quality training implementation</li> </ul>                                                                                              | 4      | Professional Conduct                     | <ul style="list-style-type: none"> <li>▪ Maintains a composed demeanor</li> <li>▪ Wears culture-appropriate clothes</li> <li>▪ Talks respectfully</li> <li>▪ Show ethnic and cultural sensitivity</li> </ul>                                                                   |
| 5      | Reporting            | <ul style="list-style-type: none"> <li>▪ Weekly work plan</li> <li>▪ Compiled feedback report after each phase of training</li> <li>▪ Daily reports</li> <li>▪ Monthly reports</li> <li>▪ Quarterly Training reports</li> </ul>                      | 5      | Result Orientation                       | <ul style="list-style-type: none"> <li>▪ Is mindful of programmatic goals</li> <li>▪ Achieves results on timely basis</li> </ul>                                                                                                                                               |
